# Supplementary material
Source: PubMed Central journal article supplement (PMC3361267)
Supplement: jm300212s_si_001.pdf [file jm300212s_si_001.pdf]

## Supporting information

### Classification of inhibitors of hepatic organic anion transporting polypeptides (OATPs) – influence of protein expression on drug-drug interactions

Maria Karlgren, Anna Vildhede, Ulf Norinder, Jacek R. Wisniewski, Emi Kimoto, Yurong Lai, Ulf Haglund and Per Artursson

| <b>Table of contents</b>                                                          | <b>Page</b>         |
|-----------------------------------------------------------------------------------|---------------------|
| OATP inhibition data and molecular descriptors (Supplementary Table 1)            | Separate excel file |
| Hill slopes for IC <sub>50</sub> curves (Supplementary Table 2)                   | S2                  |
| OATP1B3 and OATP2B1 gene specific primers (Supplementary Table 3)                 | S2                  |
| SMILES for the 225 investigated compounds (Supplementary Table 4)                 | S3                  |
| Atorvastatin kinetics (Supplementary Figure 1)                                    | S10                 |
| Overlap OATP inhibitors and CYP interacting compounds (Supplementary Figure 2)    | S11                 |
| Comparison of predicted vs experimental IC <sub>50</sub> (Supplementary Figure 3) | S12                 |
| References                                                                        | S12                 |

**Supplementary Table 2.** Hill slopes  $\pm$  standard errors for the IC<sub>50</sub> curves shown in Figure 10.

|               | OATP1B1          | OATP1B3          | OATP2B1          |
|---------------|------------------|------------------|------------------|
| Atazanavir    | -2.25 $\pm$ 0.14 | -0.86 $\pm$ 0.10 | -1.20 $\pm$ 0.30 |
| Cyclosporin   | -1.13 $\pm$ 0.24 | -2.96 $\pm$ 0.32 | -1.1 $\pm$ 0.43  |
| Doxorubicin   | -1.34 $\pm$ 0.12 | -0.51 $\pm$ 0.07 | -0.46 $\pm$ 0.09 |
| Erlotinib     | -0.87 $\pm$ 0.08 | -1.25 $\pm$ 0.41 | -1.16 $\pm$ 0.25 |
| Hoechst 3334  | -0.92 $\pm$ 0.20 | -0.95 $\pm$ 0.18 | -0.51 $\pm$ 0.06 |
| Indomethacin  | -2.04 $\pm$ 0.56 | -0.90 $\pm$ 0.08 | -2.29 $\pm$ 0.35 |
| KO143         | -                | -                | -                |
| MK571         | -1.42 $\pm$ 0.24 | -0.94 $\pm$ 0.22 | -0.89 $\pm$ 0.07 |
| Pravastatin   | -0.48 $\pm$ 0.10 | -0.66 $\pm$ 0.12 | -1.25 $\pm$ 0.15 |
| Rifampicin    | -0.86 $\pm$ 0.09 | -1.53 $\pm$ 0.13 | -0.49 $\pm$ 0.05 |
| Ritonavir     | -0.68 $\pm$ 0.20 | -1.19 $\pm$ 0.34 | -1.38 $\pm$ 0.35 |
| Sulfasalazine | -0.55 $\pm$ 0.04 | -0.98 $\pm$ 0.17 | -1.19 $\pm$ 0.13 |
| Vincristine   | -1.04 $\pm$ 0.23 | -0.83 $\pm$ 0.14 | -                |

**Supplementary Table 3.** Gene specific primer pairs for amplification and cloning of OATP1B3 and OATP2B1. Restriction sites introduced by the primers are underlined.

| Gene           | Primer sequences                                                                                |
|----------------|-------------------------------------------------------------------------------------------------|
| <b>SLCO1B3</b> | 5'-CTAG <u>GGATCC</u> ATGGACCAACATCAACATTT -3' / '5'-CTAG <u>CTCGAG</u> TTAGTTGGCAGCAGCATTGT-3' |
| <b>SLCO2B1</b> | 5'-CTAGA <u>AAGCTT</u> ATGGGACCCAGGATAGGGCC-3' /5'-CTAG <u>GATATCT</u> CACACTCGGGAATCCTCTG-3'   |

**Supplementary Table 4.** SMILES for the 225 investigated compounds.

| Compound                       | Smiles                                                                                                                                                                                                                                                 |
|--------------------------------|--------------------------------------------------------------------------------------------------------------------------------------------------------------------------------------------------------------------------------------------------------|
| 17β-estradiol                  | <chem>Oc1ccc2c(c1)CC[C@@H]1[C@@H]2CC[C@]2([C@H]1CC[C@H]2O)C</chem>                                                                                                                                                                                     |
| 1-methyl-4-phenylpyridinium    | <chem>C[n+]1ccc(cc1)c1ccccc1</chem>                                                                                                                                                                                                                    |
| 5-Carboxyfluorescein diacetate | <chem>Oc1ccc2c(c1)Oc1c([C@@]32OC(=O)c2c3ccc(c2)C(=O)O)ccc(c1)O</chem><br><chem>OC[C@H]1O[C@H](O[C@@H]2[C@@H](CO)O[C@H]([C@@H]([C@H]2O)O)O)[C@@H]([C@H]([C@@H]1O[C@H]1O[C@H](C)[C@H]([C@@H]([C@H]1O)O)N[C@H]1C=C(CO)[C@@H]([C@@H]([C@H]1O)O)O)O)</chem> |
| Acarbose                       | <chem>O=C1C=CC(=O)N[C@@H](C1)C(=O)O</chem>                                                                                                                                                                                                             |
| Aciclovir                      | <chem>Nc1nc(=O)c2c([nH]1)n(COCCO)cn2</chem>                                                                                                                                                                                                            |
| Allopurinol                    | <chem>O=c1ncnc2c1c[nH][nH]2</chem>                                                                                                                                                                                                                     |
| Amantadine                     | <chem>N[C@]12C[C@H]3C[C@@H](C2)C[C@@H](C1)C3</chem>                                                                                                                                                                                                    |
| Amitriptyline                  | <chem>CN(CC/C=C/1\c2ccccc2CCc2c1cccc2)C</chem>                                                                                                                                                                                                         |
| Amodiaquine                    | <chem>CCN(Cc1cc(ccc1O)Nc1ccnc2c1ccc(c2)Cl)CC</chem>                                                                                                                                                                                                    |
| Amprenavir                     | <chem>CC(CN(S(=O)(=O)c1ccc(cc1)N)C[C@H]([C@H](Cc1ccccc1)NC(=O)O[C@H]1CCOC1)O)C</chem>                                                                                                                                                                  |
| Astemizole                     | <chem>COc1ccc(cc1)CCN1CC[C@H](CC1)Nc1nc2c(n1Cc1ccc(cc1)F)cccc2</chem>                                                                                                                                                                                  |
| Atazanavir                     | <chem>COC(=O)N[C@@H](C(C)(C)C)C(=O)NN(Cc1ccc(cc1)c1ccccc1)C[C@@H]([C@H](Cc1ccccc1)NC(=O)[C@H](C(C)(C)C)NC(=O)OC)O</chem>                                                                                                                               |
| Atenolol                       | <chem>O[C@@H](COc1ccc(cc1)CC(=O)N)CNC(C)C</chem>                                                                                                                                                                                                       |
| Atomoxetine                    | <chem>CNCC[C@H](c1ccccc1)Oc1ccccc1C</chem>                                                                                                                                                                                                             |
| Atorvastatin                   | <chem>O[C@@H](C[C@H](CC(=O)O)O)CCn1c(C(C)C)c(c1c1ccc(cc1)F)c1ccccc1C(=O)Nc1cccc1</chem>                                                                                                                                                                |
| Baicalin                       | <chem>OC(=O)[C@H]1O[C@@H](Oc2cc3oc(cc(=O)c3c(2O)O)c2ccccc2)[C@@H]([C@H]([C@@H]1O)O)O</chem>                                                                                                                                                            |
| Benzbromarone                  | <chem>CCc1oc2c(c1C(=O)c1cc(Br)c(c(c1)Br)O)cccc2</chem>                                                                                                                                                                                                 |
| Berberine                      | <chem>COc1c(OC)ccc2c1c[n+]1CCc3c(c1c2)cc1c(c3)OCO1</chem>                                                                                                                                                                                              |
| Bestatin                       | <chem>O[C@H](C(=O)N[C@@H](C(=O)O)CC(C)C)[C@@H](Cc1ccccc1)N</chem>                                                                                                                                                                                      |
| Bromsulfalein                  | <chem>Brc1c(Br)c(Br)c2c(c1Br)C(=O)O[C@@]2(c1ccc(c(c1)S(=O)(=O)[O-])O)c1ccc(c(c1)S(=O)(=O)[O-])O</chem>                                                                                                                                                 |
| Budesonide                     | <chem>CCC[C@H]1O[C@H]2[C@](O1)(C(=O)CO)[C@@]1([C@@H](C2)[C@@H]2CCC3=CC(=O)C=C[C@@]3([C@H]2[C@H](C1)O)C)C</chem>                                                                                                                                        |
| Bufuralol                      | <chem>CCc1cccc2c1oc(c2)[C@H](CNC(C)(C)C)O</chem>                                                                                                                                                                                                       |
| Bupropion                      | <chem>Clc1cccc(c1)C(=O)[C@H](NC(C)(C)C)C</chem>                                                                                                                                                                                                        |
| Buspirone                      | <chem>O=C1CC2(CCCC2)CC(=O)N1CCCCN1CCN(CC1)c1ncccc1</chem>                                                                                                                                                                                              |
| Caffeine                       | <chem>Cn1cnc2c1c(=O)n(C)c(=O)n2C</chem>                                                                                                                                                                                                                |
| Candesartan                    | <chem>CCOc1nc2c(n1Cc1ccc(cc1)c1ccccc1c1n[nH]nn1)c(ccc2)C(=O)O</chem>                                                                                                                                                                                   |
| Captopril                      | <chem>SC[C@H](C(=O)N1CCC[C@H]1C(=O)O)C</chem>                                                                                                                                                                                                          |
| Carbamazepine                  | <chem>NC(=O)N1c2ccccc2C=Cc2c1cccc2</chem>                                                                                                                                                                                                              |
| Carnitine                      | <chem>O[C@@H](C[N+](C)(C)C)CC(=O)[O-]</chem>                                                                                                                                                                                                           |
| Cefadroxil                     | <chem>O=C([C@H](c1ccc(cc1)O)N)N[C@H]1C(=O)N2[C@H]1SCC(=C2C(=O)O)C</chem>                                                                                                                                                                               |
| Cefamandole                    | <chem>O[C@@H](C(=O)N[C@@H]1C(=O)N2[C@@H]1SCC(=C2C(=O)O)CSc1nnnn1C)c1ccccc1</chem>                                                                                                                                                                      |
| Celecoxib                      | <chem>Cc1ccc(cc1)c1cc(nn1c1ccc(cc1)S(=O)(=O)N)C(F)(F)F</chem>                                                                                                                                                                                          |
| Cerivastatin                   | <chem>COc1c(c2ccc(cc2)F)c(/C=C/[C@H](C[C@H](CC(=O)O)O)c(nc1C(C)C)C(C)C</chem>                                                                                                                                                                          |

|                    |                                                                                                                                                                                                            |
|--------------------|------------------------------------------------------------------------------------------------------------------------------------------------------------------------------------------------------------|
| Cetirizine         | <chem>OC(=O)COCCN1CCN(CC1)[C@H](c1ccc(cc1)Cl)c1ccccc1</chem>                                                                                                                                               |
| Chelerythrine      | <chem>COc1c(OC)ccc2c1c[n+](C)c1c2ccc2c1cc1OCOc1c2</chem>                                                                                                                                                   |
| Chloroquine        | <chem>CCN(CCC[C@H](Nc1ccnc2c1ccc(c2)Cl)C)CC</chem>                                                                                                                                                         |
| Chlorpromazine     | <chem>CN(CCCN1c2ccccc2Sc2c1cc(Cl)cc2)C</chem>                                                                                                                                                              |
| Chlorprothixene    | <chem>CN(CC/C=C\1/c2ccccc2Sc2c1cc(Cl)cc2)C</chem>                                                                                                                                                          |
| Chlorzoxazone      | <chem>Clc1ccc2c(c1)[nH]c(=O)o2</chem>                                                                                                                                                                      |
| Cholecystokinin 8  | <chem>CSCC[C@@H](C(=O)N(C(=O)[C@H](CC(=O)O)N)C(=O)[C@H](Cc1c[nH]c2c1cccc2)NC(=O)[C@H]([C@H](OS(=O)(=O)O)C)NC(=O)[C@@H](NC(=O)[C@H](Cc1ccc(cc1)O)N)CCSC)NCCCCC(=O)N[C@H](C(=O)N)Cc1ccccc1</chem>            |
| Cholic acid        | <chem>O[C@@H]1CC[C@]2([C@@H](C1)C[C@H]([C@@H]1[C@@H]2C[C@H](O)[C@]2([C@H]1)CC[C@@H]2[C@@H](CCC(=O)O)C)O)C</chem>                                                                                           |
| Cimetidine         | <chem>N#CN/C(=N\C)/NCCSCc1nc[nH]c1C</chem>                                                                                                                                                                 |
| Clarithromycin     | <chem>CC[C@H]1OC(=O)[C@H](C)[C@@H](O[C@@H]2C[C@](C)(OC)[C@@H]([C@H](O2)C)O)[C@H](C)[C@@H](O[C@@H]2O[C@H](C)C[C@@H]([C@H]2O)N(C)C)[C@](C[C@H](C(=O)[C@@H]([C@H]([C@]1(C)O)O)C)C)C)OC</chem>                 |
| Clotrimazole       | <chem>Clc1ccccc1[C@@](n1cncc1)(c1ccccc1)c1ccccc1</chem>                                                                                                                                                    |
| Colchicine         | <chem>COc1c(OC)cc2c(c1OC)c1ccc(c(=O)cc1[C@H](CC2)NC(=O)C)OC</chem>                                                                                                                                         |
| Coumarin           | <chem>O=c1ccc2c(o1)cccc2</chem>                                                                                                                                                                            |
| Coumestrol         | <chem>Oc1ccc2c(c1)oc(=O)c1c2oc2c1ccc(c2)O</chem>                                                                                                                                                           |
| Cyclosporine A     | <chem>C/C=C/C[C@H]([C@H]([C@H]1C(=O)N[C@@H](CC)C(=O)N(C)CC(=O)N(C)[C@@H](CC(C)C)C(=O)N[C@@H](C(C)C)C(=O)N(C)[C@@H](CC(C)C)C(=O)N[C@@H](C(=O)N[C@@H](C(=O)N[C@@H](C(=O)N1C)C(C)C)CC(C)C)CC(C)C)C)O)C</chem> |
| Daidzein           | <chem>Oc1ccc(cc1)c1coc2c(c1=O)ccc(c2)O</chem>                                                                                                                                                              |
| Desipramine        | <chem>CNCCCN1c2ccccc2CCc2c1cccc2</chem>                                                                                                                                                                    |
| Dexamethasone      | <chem>OCC(=O)[C@@]1(O)[C@H](C)[C@@H]2[C@]1(C)C[C@H](O)[C@]1([C@H]2CCC2=CC(=O)C=C[C@]12)C)F</chem>                                                                                                          |
| Dextromethorphan   | <chem>COc1ccc2c(c1)[C@@]13CCCC[C@@H]3[C@H](C2)N(CC1)C</chem>                                                                                                                                               |
| Diazepam           | <chem>Clc1ccc2c(c1)C(=NCC(=O)N2C)c1ccccc1</chem>                                                                                                                                                           |
| Diclofenac         | <chem>OC(=O)Cc1ccccc1Nc1c(Cl)cccc1Cl</chem>                                                                                                                                                                |
| Diethylstilbestrol | <chem>CC/C(=C(\c1ccc(cc1)O)/CC)/c1ccc(cc1)O</chem>                                                                                                                                                         |
| Digoxin            | <chem>O=C1OCC(=C1)[C@@H]1CC[C@]2([C@]1(C)[C@H](O)C[C@H]1[C@H]2CC[C@H]2[C@]1(C)CC[C@@H](C2)O[C@H]1C[C@H](O)[C@@H]([C@H](O1)C)O[C@H]1C[C@H](O)[C@@H]([C@H](O1)C)O[C@H]1C[C@H](O)[C@@H]([C@H](O1)C)O)O</chem> |
| Diltiazem          | <chem>COc1ccc(cc1)[C@@H]1Sc2ccccc2N(C(=O)[C@@H]1OC(=O)C)CCN(C)C</chem>                                                                                                                                     |
| Dipyridamole       | <chem>OCCN(c1nc(N2CCCC2)c2c(n1)c(nc(n2)N(CCO)CCO)N1CCCC1)CCO</chem>                                                                                                                                        |
| Disopyramide       | <chem>CC(N(C(C)C)CC[C@](c1ccccc1)(c1ccccc1)C(=O)N)C</chem>                                                                                                                                                 |
| Disulfiram         | <chem>CCN(C(=S)SSC(=S)N(CC)CC)CC</chem>                                                                                                                                                                    |
| Dofetilide         | <chem>CN(CCC1ccc(cc1)NS(=O)(=O)C)CCOc1ccc(cc1)NS(=O)(=O)C</chem>                                                                                                                                           |
| Doxazosin          | <chem>COc1cc2nc(nc2cc1OC)N)N1CCN(CC1)C(=O)[C@H]1COc2c(O1)cccc2</chem>                                                                                                                                      |
| Doxorubicin        | <chem>OCC(=O)[C@@]1(O)C[C@H](O[C@H]2C[C@H](N)[C@@H]([C@@H](O2)C)O)c2c(C1)c(O)c1c(c2O)C(=O)c2c(C1=O)cccc2OC</chem>                                                                                          |
| Efavirenz          | <chem>FC([C@@]1(C#CC2CC2)OC(=O)Nc2c1cc(Cl)cc2)(F)F</chem>                                                                                                                                                  |
| Eletriptan         | <chem>CN1CCC[C@@H]1Cc1c[nH]c2c1cc(cc2)CCS(=O)(=O)c1ccccc1</chem>                                                                                                                                           |
| Emtricitabine      | <chem>Nc1nc(=O)n(cc1F)[C@@H]1CS[C@@H](O1)CO</chem>                                                                                                                                                         |
| Enalapril          | <chem>CCOC(=O)[C@H](N[C@H](C(=O)N1CCC[C@H]1C(=O)O)C)CCc1ccccc1</chem>                                                                                                                                      |

|                            |                                                                                                                                                                                                                 |
|----------------------------|-----------------------------------------------------------------------------------------------------------------------------------------------------------------------------------------------------------------|
| Erlotinib                  | <chem>COCCOc1cc2c(ncnc2cc1OCCOC)Nc1cccc(c1)C#C</chem>                                                                                                                                                           |
| Erythromycin               | <chem>CC[C@H]1OC(=O)[C@H](C)[C@@H](O[C@@H]2O[C@@H](C)[C@@H]([C@](C2)(C)OC)O)[C@H](C)[C@@H](O[C@@H]2O[C@@H](C)C[C@@H]([C@H]2O)N(C)C)[C@](C[C@H](C(=O)[C@@H]([C@H]([C@]1(C)O)O)C)C)(C)O</chem>                    |
| Estradiol-17-β-glucuronide | <chem>[O-]C(=O)[C@@H]1O[C@@H](O[C@@H]2CC[C@H]3[C@@]2(C)CC[C@H]2[C@H]3CCc3c2ccc(c3)O)[C@@H]([C@@H]([C@@H]1O)O)O</chem>                                                                                           |
| Estrone-3-sulphate         | <chem>O=C1CC[C@@H]2[C@]1(C)CC[C@H]1[C@H]2CCc2c1ccc(c2)OS(=O)(=O)O</chem>                                                                                                                                        |
| Etoposide                  | <chem>COc1cc(cc(c1O)OC)[C@H]1[C@H]2C(=O)OC[C@@H]2[C@@H](c2c1cc1OCCOc1c2)O[C@@H]1O[C@@H]2CO[C@H](O[C@H]2[C@@H]([C@H]1O)O)C</chem>                                                                                |
| Ezetimibe                  | <chem>Oc1ccc(cc1)[C@@H]1[C@@H](CC[C@@H](c2ccc(cc2)F)O)C(=O)N1c1ccc(cc1)F</chem>                                                                                                                                 |
| Felodipine                 | <chem>CCOC(=O)C1=C(C)NC(=C([C@H]1c1cccc(c1Cl)Cl)C(=O)OC)C</chem>                                                                                                                                                |
| Fendiline                  | <chem>C[C@@H](c1ccccc1)NCC[C@@H](c1ccccc1)c1ccccc1</chem>                                                                                                                                                       |
| Fenofibrate                | <chem>CC(OC(=O)C(Oc1ccc(cc1)C(=O)c1ccc(cc1)Cl)(C)C)C</chem>                                                                                                                                                     |
| Fentanyl                   | <chem>CCC(=O)N(c1ccccc1)[C@@H]1CCN(CC1)CCc1ccccc1</chem>                                                                                                                                                        |
| Fexofenadine               | <chem>OC(=O)C(c1ccc(cc1)[C@H](CCCN1CC[C@H](CC1)[C@@](c1ccccc1)(c1ccccc1)O)O)(C)C</chem>                                                                                                                         |
| Fluconazole                | <chem>Fc1ccc(c(c1)F)[C@](Cn1cncn1)(Cn1cncn1)O</chem>                                                                                                                                                            |
| Fluo-3                     | <chem>OC(=O)CN(c1ccc(cc1OCCOc1cc(C)ccc1N(CC(=O)O)CC(=O)O)c1c2cc(Cl)c(=O)cc2oc2c1cc(Cl)c(c2)O)CC(=O)O</chem>                                                                                                     |
| Fluoxetine                 | <chem>CNCC[C@H](c1ccccc1)Oc1ccc(cc1)C(F)(F)F</chem>                                                                                                                                                             |
| Flupenthixol               | <chem>OCCN1CCN(CC1)CC/C=C\1/c2ccccc2Sc2c1cc(cc2)C(F)(F)F</chem>                                                                                                                                                 |
| Flutamide                  | <chem>O=C(C(C)C)Nc1ccc(c(c1)C(F)(F)F)[N+](=O)[O-]</chem>                                                                                                                                                        |
| Fluvastatin                | <chem>OC(=O)C[C@H](C[C@H](/C=C/c1c(c2ccc(cc2)F)c2c(n1C(C)C)cccc2)O)O</chem>                                                                                                                                     |
| Fluvoxamine                | <chem>NCCO/N=C(\c1ccc(cc1)C(F)(F)F)/CCCCOC</chem>                                                                                                                                                               |
| Furafylline                | <chem>Cc1[nH]c2c(n1)n(Cc1cccc1)c(=O)n(c2=O)C</chem>                                                                                                                                                             |
| Furosemide                 | <chem>OC(=O)c1cc(c(cc1NCc1cccc1)Cl)S(=O)(=O)N</chem>                                                                                                                                                            |
| Gemfibrozil                | <chem>Cc1ccc(c(c1)OCCCC(C(=O)O)(C)C)C</chem>                                                                                                                                                                    |
| Genistein                  | <chem>Oc1ccc(cc1)c1coc2c(c1=O)c(O)cc(c2)O</chem>                                                                                                                                                                |
| GF120918 (elacridar)       | <chem>COc1cc2CN(CCc3ccc(cc3)NC(=O)c3ccccc3c4c3[nH]c3c(OC)cccc3c4=O)CCc2cc1OC</chem>                                                                                                                             |
| Glipizide                  | <chem>Cc1ncc(nc1)C(=O)NCCc1ccc(cc1)S(=O)(=O)NC(=O)NC1CCCCC1</chem>                                                                                                                                              |
| Glibenclamide              | <chem>COc1ccc(cc1C(=O)NCCc1ccc(cc1)S(=O)(=O)NC(=O)NC1CCCCC1)Cl</chem>                                                                                                                                           |
| Glycochenodeoxycholate     | <chem>O[C@@H]1CC[C@]2([C@@H](C1)C[C@H]([C@@H]1[C@@H]2CC[C@]2([C@H]1CC[C@@H]2[C@@H])(CCC(=O)NCC(=O)[O-])C)C)O)C</chem>                                                                                           |
| Glycocholic acid           | <chem>O[C@@H]1CC[C@]2([C@@H](C1)C[C@H]([C@@H]1[C@@H]2C[C@H](O)[C@]2([C@H]1CC[C@@H]2[C@@H])(CCC(=O)NCC(=O)O)C)O)C</chem>                                                                                         |
| Glycodeoxycholate          | <chem>O[C@@H]1CC[C@]2([C@@H](C1)CC[C@@H]1[C@@H]2C[C@H](O)[C@]2([C@H]1CC[C@@H]2[C@@H])(CCC(=O)NCC(=O)O)C)C)C</chem>                                                                                              |
| Glycyl proline             | <chem>NCC(=O)N1CCC[C@@H]1C(=O)O</chem>                                                                                                                                                                          |
| Glycyrrhizic acid          | <chem>O[C@@H]1[C@@H](O[C@@H]2O[C@@H](C(=O)O)[C@H]([C@@H]([C@H]2O)O)O)[C@H](O[C@@H]([C@H]1O)C(=O)O)O[C@H]1CC[C@]2([C@H](C1(C)C)CC[C@@]1([C@@H]2C(=O)C=C2[C@@]1(C)CC[C@@]1([C@H]2C[C@](C)(CC1)C(=O)O)C)C)C</chem> |
| Hoechst 33342              | <chem>CCOc1ccc(cc1)C1=NCc2c(N1)ccc(c2)C1=NCc2c(N1)ccc(c2)N1CCN(CC1)C</chem>                                                                                                                                     |
| Hygromycin                 | <chem>CC(=O)[C@H]1O[C@H]([C@H]([C@@H]1O)O)Oc1ccc(cc1O)/C=C/C(=O)N[C@@H]1[C@H](O)[C@@H](O)[C@@H]2[C@H]([C@@H]1O)OCO2)\C</chem>                                                                                   |
| Ibuprofen                  | <chem>CC(Cc1ccc(cc1)[C@H](C(=O)O)C)C</chem>                                                                                                                                                                     |
| Imipramine                 | <chem>CN(CCCN1c2ccccc2CCc2c1cccc2)C</chem>                                                                                                                                                                      |
| Indinavir                  | <chem>O[C@H](CN1CCN(C[C@H]1C(=O)NC(C)(C)C)Cc1ccnc1)C[C@H](C(=O)N[C@@H]1[C@H</chem>                                                                                                                              |

)(O)Cc2c1cccc2)Cc1cccc1  
 Indocyanine green [O-]S(=O)(=O)CCCN1c2ccc3c(c2C(/C/1=C/C=C/C=C/C=C/C1=[N+](CCCCS(=O)(=O)[O-])c2c(C1(C)C)c1cccc1cc2)(C)C)cccc3  
 Indomethacin COc1ccc2c(c1)c(CC(=O)O)c(n2C(=O)c1ccc(cc1)Cl)C  
 Irinotecan CC[C@@]1(O)C(=O)OCc2c1cc1c3nc4ccc(cc4c(c3Cn1c2=O)CC)OC(=O)N1CC[C@H](CC1)N1CCCC1  
 Isoniazid NNC(=O)c1ccncc1  
 Isradipine COC(=O)C1=C(C)NC(=C([C@H]1c1cccc2c1non2)C(=O)OC(C)C)C  
 Itraconazole CC[C@H](n1ncn(c1=O)c1ccc(cc1)N1CCN(CC1)c1ccc(cc1)OC[C@H]1CO[C@](O1)(Cn1cn1)c1ccc(cc1)Cl)Cl)C  
 Ivermectin CO[C@H]1C[C@H](O[C@H]2[C@@H](C)/C=C/C=C/3\CO[C@H]4[C@]3(O)[C@@H](C=C([C@H]4O)C)C(=O)O[C@H]3[C@@H](C/C=C/2\CO[C@]2(C3)CC[C@@H]([C@H](O2)[C@H](CC)C)C)O[C@H]([C@@H]1O[C@H]1C[C@H](OC)[C@H]([C@@H](O1)C)O)C  
 Ketoconazole Clc1ccc(c(c1)Cl)[C@@]1(OC[C@H](O1)COc1ccc(cc1)N1CCN(CC1)C(=O)C)Cn1cncc1  
 KO143 COc1ccc2c(c1)[nH]c1c2C[C@@H]2N([C@H]1CC(C)C)C(=O)[C@@H](NC2=O)CCC(=O)OC(C)C  
 Lamotrigine Nc1nnc(c(n1)N)c1cccc(c1)Cl)Cl  
 Lansoprazole O=[S@](c1nc2c([nH]1)cccc2)Cc1nccc(c1C)OCC(F)(F)F  
 Levothyroxin OC(=O)[C@H](Cc1cc(l)c(c(c1))O)c1cc(l)c(c(c1))O)N  
 Lisinopril NCCCC[C@@H](C(=O)N1CCC[C@H]1C(=O)O)N[C@H](C(=O)O)CCc1cccc1  
 Loperamide Clc1ccc(cc1)[C@]1(O)CCN(CC1)CC[C@](C(=O)N(C)C)(c1cccc1)c1cccc1  
 Lopinavir O=C(N[C@H]([C@H](C[C@H](Cc1cccc1)NC(=O)[C@@H](N1CCCNC1=O)C(C)O)Cc1ccc1)COc1c(C)cccc1C  
 Loratadine CCOC(=O)N1CCC(=C2c3ccc(cc3CCc3c2nccc3)Cl)CC1  
 Lovastatin CC[C@@H](C(=O)O[C@H]1C[C@@H](C)C=C2[C@H]1[C@@H](CC[C@@H]1C[C@@H](O)CC(=O)O1)[C@H](C=C2)C)C  
 Mephenytoin CC[C@]1(NC(=O)N(C1=O)C)c1cccc1  
 Metformin CN(C(=N)NC(=N)N)C  
 Methotrexate OC(=O)CC[C@@H](C(=O)O)NC(=O)c1ccc(cc1)N(Cc1cnc2c(n1)c(N)nc(n2)N)C  
 Methoxsalen COc1c2oc(=O)ccc2cc2c1occ2  
 Metoprolol COCCc1ccc(cc1)OC[C@H](CNC(C)C)O  
 Midazolam Clc1ccc2c(c1)C(=NCc1n2c(C)nc1)c1cccc1F  
 Mifepristone CC#C[C@]1(O)CC[C@H]2[C@]1(C)C[C@H](c1ccc(cc1)N(C)C)C1=C3CCC(=O)C=C3CC[C@@H]21  
 Mitoxantrone OCCNCCNc1ccc(c2c1C(=O)c1c(C2=O)c(O)ccc1O)NCCNCCO  
 MK571 OC(=O)CCS[C@H](c1cccc(c1)/C=C/c1ccc2c(n1)cc(cc2)Cl)SCCC(=O)N(C)C  
 Moclobemide O=C(c1ccc(cc1)Cl)NCCN1CCOCC1  
 Morin Oc1ccc(c(c1)O)c1oc2cc(O)cc(c2c(=O)c1O)O  
 Naringenin Oc1ccc(cc1)[C@@H]1CC(=O)c2c(O1)cc(cc2O)O  
 Naringin OC[C@H]1O[C@@H](Oc2cc(O)c3c(c2)O[C@@H](CC3=O)c2ccc(cc2)O)[C@@H]([C@H]([C@@H]1O)O)O[C@@H]1O[C@@H](C)[C@@H]([C@H]([C@H]1O)O)O  
 Nefazodone CCc1nn(c(=O)n1CCOc1cccc1)CCCN1CCN(CC1)c1cccc(c1)Cl  
 Nelfinavir O[C@@H]([C@@H](NC(=O)c1cccc(c1)O)CSc1cccc1)CN1C[C@H]2CCCC[C@H]2[C@H]1C(=O)NC(C)C)C  
 Nicardipine COC(=O)C1=C(C)NC(=C([C@H]1c1cccc(c1)[N+](=O)[O-])C(=O)OCCN(Cc1cccc1)C)C  
 Nicotine CN1CCC[C@H]1c1ccncc1  
 Nifedipine COC(=O)C1=C(C)NC(=C([C@@H]1c1cccc1[N+](=O)[O-])C(=O)OC)C

|                            |                                                                                                                                                                                                                          |
|----------------------------|--------------------------------------------------------------------------------------------------------------------------------------------------------------------------------------------------------------------------|
| Nitrofurantoin             | <chem>O=C1NC(=O)N(C1)/N=C\c1ccc(o1)[N+](=O)[O-]</chem>                                                                                                                                                                   |
| N-methylnicotinamide       | <chem>CNC(=O)c1cccnc1</chem>                                                                                                                                                                                             |
| N-methylpyridinium, ASP+   | <chem>C[n+]1cccc1</chem>                                                                                                                                                                                                 |
| N-methyl-quinidine         | <chem>C=C[C@H]1C[N@+]2(C)CC[C@H]1C[C@@H]2[C@H](c1ccnc2c1cc(OC)cc2)O</chem>                                                                                                                                               |
| Nootkatone                 | <chem>O=C1C[C@@H](C)[C@]2(C=C1)CC[C@H](C2)C(=C)C</chem>                                                                                                                                                                  |
| Novobiocin                 | <chem>CO[C@@H]1[C@@H](OC(=O)N)[C@@H](O)[C@@H](OC1(C)C)Oc1ccc2c(c1C)oc(=O)c(2O)NC(=O)c1ccc(c(c1)CC=C(C)C)O</chem>                                                                                                         |
| Nystatin                   | <chem>O[C@@H]1CC[C@H](O)[C@H](O)CC(=O)C[C@H](O)[C@@H](C(=O)O)[C@H](O)C[C@@H](/C=C/C=C/C=C/C=CC/C=C/C=C/[C@@H]([C@@H]([C@@H]([C@@H](OC(=O)C[C@@H](C[C@@H](C1)O)O)C)O)C)O[C@@H]1O[C@H](C)[C@H]([C@@H]([C@@H]1)O)N)O</chem> |
| Ofloxacin                  | <chem>CN1CCN(CC1)c1c(F)cc2c3c1OC[C@@H](n3cc(c2=O)C(=O)O)C</chem>                                                                                                                                                         |
| Olmesartan                 | <chem>CCCc1nc(c(n1Cc1ccc(cc1)c1ccccc1c1n[nH]nn1)C(=O)OCc1oc(=O)oc1C)C(O)(C)C</chem>                                                                                                                                      |
| Omeprazole                 | <chem>COc1ccc2c(c1)[nH]c(n2)[S@](=O)Cc1ncc(c(c1C)OC)C</chem>                                                                                                                                                             |
| Ondansetron                | <chem>O=C1[C@H](CCc2c1c1cccc1n2C)Cn1ccnc1C</chem>                                                                                                                                                                        |
| Ouabain                    | <chem>OC[C@@]12[C@H](O)C[C@@H](C[C@@]2(O)CC[C@@H]2[C@@H]1[C@H](O)C[C@]1([C@]2(O)CC[C@@H]1C1=CC(=O)OC1)C)O[C@@H]1O[C@@H](C)[C@@H]([C@H]([C@H]1O)O)O</chem>                                                                |
| Oxaliplatin                | <chem>O=C1O[Pt]2(OC1=O)N[C@H]1[C@H](N2)CCCC1</chem>                                                                                                                                                                      |
| Paclitaxel                 | <chem>CC(=O)O[C@H]1C(=O)[C@]2(C)[C@@H](O)C[C@@H]3[C@]([C@H]2[C@@H]([C@]2(C)C1=C(C)[C@@H](OC(=O)[C@@H]([C@H](c1ccccc1)NC(=O)c1ccccc1)O)C2)(C)C)OC(=O)c1ccccc1)(CO3)OC(=O)C</chem>                                         |
| P-aminohippuric acid       | <chem>O=C(c1ccc(cc1)N)NCC(=O)O</chem>                                                                                                                                                                                    |
| Pantoprazole               | <chem>COc1c(OC)ccnc1C[S@](=O)c1nc2c([nH]1)cc(cc2)OC(F)F</chem>                                                                                                                                                           |
| Paroxetine                 | <chem>Fc1ccc(cc1)[C@@H]1CCNC[C@H]1COc1ccc2c(c1)OCO2</chem>                                                                                                                                                               |
| Penicillin G               | <chem>O=C(Cc1ccccc1)N[C@@H]1C(=O)N2[C@@H]1SC([C@@H]2C(=O)O)(C)C</chem>                                                                                                                                                   |
| Phalloidin                 | <chem>OC[C@](C)[C@@H]1NC(=O)[C@H]2NC(=O)[C@H](C)NC(=O)[C@@H]3C[C@H](CN3C(=O)[C@H](CSc3c(C2)c2ccccc2[nH]3)NC(=O)[C@@H](NC(=O)[C@@H](NC1=O)C)[C@H](O)C)O)O)C</chem>                                                        |
| Phenacetin                 | <chem>CCOc1ccc(cc1)NC(=O)C</chem>                                                                                                                                                                                        |
| Phenformin                 | <chem>N=C(NC(=N)N)NCCc1ccccc1</chem>                                                                                                                                                                                     |
| Phenobarbital              | <chem>CCC1(C(=O)NC(=O)NC1=O)c1ccccc1</chem>                                                                                                                                                                              |
| Phenylbutazone             | <chem>CCCC[C@@H]1C(=O)N(N(C1=O)c1ccccc1)c1ccccc1</chem>                                                                                                                                                                  |
| Phenylethyl isothiocyanate | <chem>S=C=NCCc1ccccc1</chem>                                                                                                                                                                                             |
| Phenytoin                  | <chem>O=C1NC(=O)N[C@@]1(c1ccccc1)c1ccccc1</chem>                                                                                                                                                                         |
| Pilsicainide               | <chem>O=C(C[C@]12CCCN2CCC1)Nc1c(C)cccc1C</chem>                                                                                                                                                                          |
| Pindolol                   | <chem>O[C@@H](COc1ccc2c1cc[nH]2)CNC(C)C</chem>                                                                                                                                                                           |
| Pioglitazone               | <chem>CCc1ccc(nc1)CCOc1ccc(cc1)C[C@H]1SC(=O)NC1=O</chem>                                                                                                                                                                 |
| Piroxicam                  | <chem>O/C(=C/1\C(=O)c2ccccc2S(=O)(=O)N1C)/Nc1cccn1</chem>                                                                                                                                                                |
| Pitavastatin               | <chem>O[C@H](C[C@@H](/C=C/c1c(nc2c(c1c1ccc(cc1)F)cccc2)C1CC1)O)CC(=O)O</chem>                                                                                                                                            |
| Pravastatin                | <chem>CC[C@@H](C(=O)O)[C@H]1C[C@H](O)C=C2[C@H]1[C@@H](CC[C@H](C[C@H](CC(=O)O)O)O)[C@H](C=C2)C)C</chem>                                                                                                                   |
| Prazosin                   | <chem>COc1cc2nc(nc2cc1OC)N)N1CCN(CC1)C(=O)c1ccco1</chem>                                                                                                                                                                 |
| Prednisolone               | <chem>OCC(=O)[C@@]1(O)CC[C@@H]2[C@]1(C)C[C@H](O)[C@H]1[C@H]2CCC2=CC(=O)C=C[C@]12C</chem>                                                                                                                                 |
| Probenecid                 | <chem>CCCN(S(=O)(=O)c1ccc(cc1)C(=O)O)CCC</chem>                                                                                                                                                                          |

|                        |                                                                                                                                                                                                                             |
|------------------------|-----------------------------------------------------------------------------------------------------------------------------------------------------------------------------------------------------------------------------|
| Procainamide           | <chem>CCN(CCNC(=O)c1ccc(cc1)N)CC</chem>                                                                                                                                                                                     |
| Progesterone           | <chem>O=C1CC[C@]2(C(=C1)CC[C@@H]1[C@@H]2CC[C@]2([C@H]1CC[C@@H]2C(=O)C)C)C</chem>                                                                                                                                            |
| Propranolol            | <chem>O[C@@H](COc1cccc2c1cccc2)CNC(C)C</chem>                                                                                                                                                                               |
| PSC833                 | <chem>C/C=C/C[C@H](C(=O)[C@H]1C(=O)N[C@@H](C(C)C)C(=O)N(C)CC(=O)N(C)[C@@H](CC(C)C)C(=O)N[C@@H](C(C)C)C(=O)N(C)[C@@H](CC(C)C)C(=O)N[C@@H](C(=O)N([C@H](C(=O)N([C@H](C(=O)N([C@H](C(=O)N1C)C(C)C)CC(C)C)CC(C)C)C)C)C)C</chem> |
| Quercetin              | <chem>Oc1cc(O)c2c(c1)oc(c(c2=O)O)c1ccc(c(c1)O)O</chem>                                                                                                                                                                      |
| Quinidine              | <chem>C=C[C@H]1CN2CC[C@H]1C[C@@H]2[C@H](c1ccnc2c1cc(OC)cc2)O</chem>                                                                                                                                                         |
| Quinine                | <chem>C=C[C@H]1CN2CC[C@H]1C[C@@H]2[C@H](c1ccnc2c1cc(OC)cc2)O</chem>                                                                                                                                                         |
| Ranolazine             | <chem>COc1cccc1OC[C@H](CN1CCN(CC1)CC(=O)Nc1c(C)cccc1C)O</chem>                                                                                                                                                              |
| Repaglinide            | <chem>CCOc1cc(ccc1C(=O)O)CC(=O)N[C@H](c1cccc1N1CCCC1)CC(C)C</chem>                                                                                                                                                          |
| Reserpine              | <chem>COc1ccc2c(c1)[nH]c1c2CCN2[C@@H]1C[C@H]1[C@@H](C2)C[C@H]([C@@H]([C@H]1C(=O)OC)OC)OC(=O)c1cc(OC)c(c1)OC)OC</chem>                                                                                                       |
| Rifampin               | <chem>CO[C@H]1/C=C/O[C@@]2(C)Oc3c(C2=O)c2c(=O)/C(=C/NN4CCN(CC4)C)/C(=C(c2c(c3C)O)O)NC(=O)/C(=C\C=C\C[C@@H]([C@@H]([C@H]([C@H]([C@H]([C@@H]1C)OC(=O)C)O)C)O)C)/C</chem>                                                      |
| Rifamycin SV           | <chem>CO[C@H]1/C=C/O[C@@]2(C)Oc3c(C2=O)c2c(O)cc(c(c2c(c3C)O)O)NC(=O)/C(=C/C=C/[C@@H]([C@@H]([C@H]([C@H]([C@H]([C@H]1C)OC(=O)C)O)C)O)C)/C</chem>                                                                             |
| Ritonavir              | <chem>O=C(N[C@H]([C@H](C[C@H](Cc1cccc1)NC(=O)[C@H](C(C)C)NC(=O)N(Cc1csc(n1)C(C)C)O)Cc1cccc1)OCc1cnsc1</chem>                                                                                                                |
| Rosiglitazone          | <chem>O=C1NC(=O)[C@H](S1)Cc1ccc(cc1)OCCN(c1ccccn1)C</chem>                                                                                                                                                                  |
| Rosuvastatin           | <chem>O[C@H](C[C@H](CC(=O)O)O)/C=C/c1c(nc(nc1c1ccc(cc1)F)N(S(=O)(=O)C)C)C(C)C</chem>                                                                                                                                        |
| Sanguinarine           | <chem>C[n+]1cc2c3OCOC3ccc2c2c1c1cc3OCOC3cc1cc2</chem>                                                                                                                                                                       |
| Saquinavir             | <chem>NC(=O)C[C@@H](C(=O)N[C@H]([C@@H](CN1C[C@@H]2CCCC[C@H]2C[C@H]1C(=O)NC(C)C)O)Cc1cccc1)NC(=O)c1ccc2c(n1)cccc2</chem>                                                                                                     |
| Sildenafil             | <chem>CCCc1nn(c2c1[nH]c(nc2=O)c1cc(ccc1OCC)S(=O)(=O)N1CCN(CC1)C)C</chem>                                                                                                                                                    |
| Silymarin              | <chem>OC[C@H]1Oc2ccc(cc2O[C@@H]1c1ccc(c(c1)OC)O)[C@H]1Oc2cc(O)cc(c2C(=O)[C@@H]1)O</chem>                                                                                                                                    |
| Simvastatin            | <chem>CCC(C(=O)O[C@H]1C[C@@H](C)C=C2[C@H]1[C@@H](CC[C@H]1C[C@@H](O)CC(=O)O1)[C@H](C=C2)C)C(C)C</chem>                                                                                                                       |
| Sotalol                | <chem>CC(NC[C@H](c1ccc(cc1)NS(=O)(=O)C)O)C</chem>                                                                                                                                                                           |
| Spirolactone           | <chem>CC(=O)S[C@@H]1CC2=CC(=O)CC[C@@]2([C@@H]2[C@@H]1[C@@H]1CC[C@]3([C@]1(CC2)C)CCC(=O)O3)C</chem>                                                                                                                          |
| Sulfaphenazole         | <chem>Nc1ccc(cc1)S(=O)(=O)Nc1ccnn1c1cccc1</chem>                                                                                                                                                                            |
| Sulfasalazine          | <chem>OC(=O)c1cc(/N=N/c2ccc(cc2)S(=O)(=O)Nc2cccn2)ccc1O</chem>                                                                                                                                                              |
| Tamoxifen              | <chem>CC/C(=C(\c1cccc1)/c1ccc(cc1)OCCN(C)C)/c1cccc1</chem>                                                                                                                                                                  |
| Taurochenodeoxycholate | <chem>O[C@@H]1CC[C@]2([C@@H](C1)C[C@H]([C@@H]1[C@@H]2CC[C@]2([C@H]1CC[C@@H]2[C@@H](CCC(=O)NCCS(=O)(=O)[O-])C)O)C</chem>                                                                                                     |
| Taurocholate           | <chem>O[C@@H]1CC[C@]2([C@@H](C1)C[C@H]([C@@H]1[C@@H]2C[C@H](O)[C@]2([C@H]1CC[C@@H]2[C@@H](CCC(=O)NCCS(=O)(=O)O)C)O)C</chem>                                                                                                 |
| Taurodeoxycholate      | <chem>O[C@@H]1CC[C@]2([C@@H](C1)CC[C@@H]1[C@@H]2C[C@H](O)[C@]2([C@H]1CC[C@@H]2[C@@H](CCC(=O)NCCS(=O)(=O)O)C)C</chem>                                                                                                        |
| Taurolithocholate      | <chem>O[C@@H]1CC[C@]2([C@@H](C1)CC[C@@H]1[C@@H]2CC[C@]2([C@H]1CC[C@@H]2[C@@H](CCC(=O)NCCS(=O)(=O)[O-])C)C</chem>                                                                                                            |
| Telmisartan            | <chem>CCCc1nc2c(n1Cc1ccc(cc1)c1cccc1C(=O)O)cc(cc2C)c1nc2c(n1C)cccc2</chem>                                                                                                                                                  |
| Tenofovir              | <chem>C[C@H](Cn1cnc2c1ncnc2N)OCP(=O)(O)O</chem>                                                                                                                                                                             |
| Terfenadine            | <chem>O[C@H](c1ccc(cc1)C(C)C)CCCN1CC[C@H](CC1)[C@@](c1cccc1)(c1cccc1)O</chem>                                                                                                                                               |



|                    |                                                                                                                                                                     |
|--------------------|---------------------------------------------------------------------------------------------------------------------------------------------------------------------|
| Testosterone       | <chem>O=C1CC[C@]2(C=C1)CC[C@@H]1[C@@H]2CC[C@]2([C@H]1CC[C@@H]2O)C</chem>                                                                                            |
| Tetracycline       | <chem>CN([C@@H]1C(=C(C(=O)N)C(=O)[C@@]2([C@H]1C[C@H]1C(=C2O)C(=O)c2c([C@@]1(C)O)cccc2O)O)C</chem>                                                                   |
| Tetraethylammonium | <chem>CC[N+](CC)(CC)CC</chem>                                                                                                                                       |
| Theophylline       | <chem>Cn1c(=O)n(C)c2c(c1=O)[nH]cn2</chem>                                                                                                                           |
| Thioridazine       | <chem>CSc1ccc2c(c1)N(CC[C@H]1CCCCN1C)c1c(S2)cccc1</chem>                                                                                                            |
| Thiotepa           | <chem>S=P(N1CC1)(N1CC1)N1CC1</chem>                                                                                                                                 |
| Ticlopidine        | <chem>Clc1cccc1CN1CCc2c(C1)ccs2</chem>                                                                                                                              |
| Tipranavir         | <chem>CCC[C@@]1(CCc2cccc2)CC(=O)C(=C(O1)O)[C@@H](c1cccc(c1)NS(=O)(=O)c1ccc(cn1)C(F)(F)F)CC</chem>                                                                   |
| Tolbutamide        | <chem>CCCCNC(=O)NS(=O)(=O)c1ccc(cc1)C</chem>                                                                                                                        |
| Topotecan          | <chem>CC[C@@]1(O)C(=O)OCc2c1cc1c3nc4ccc(c(c4cc3Cn1c2=O)CN(C)C)O</chem>                                                                                              |
| Tranlycypromine    | <chem>N[C@@H]1C[C@H]1c1cccc1</chem>                                                                                                                                 |
| Triazolam          | <chem>Clc1ccc2c(c1)C(=NCc1n2c(C)nn1)c1cccc1Cl</chem>                                                                                                                |
| Trimethoprim       | <chem>COc1cc(Cc2cnc(nc2N)N)cc(c1OC)OC</chem>                                                                                                                        |
| Valaciclovir       | <chem>CC([C@@H](C(=O)OCCOCn1cnc2c1[nH]c(N)nc2=O)N)C</chem>                                                                                                          |
| Valproic acid      | <chem>CCCC(C(=O)O)CCC</chem>                                                                                                                                        |
| Valsartan          | <chem>CCCCC(=O)N([C@H](C(=O)O)C(C)C)Cc1ccc(cc1)c1cccc1c1n[nH]nn1</chem>                                                                                             |
| Varenicline        | <chem>N1C[C@@H]2C[C@H](C1)c1c2cc2c(c1)nccn2</chem>                                                                                                                  |
| Warfarin           | <chem>CC(=O)C[C@H](c1c(O)oc2c(c1=O)cccc2)c1cccc1</chem>                                                                                                             |
| Verapamil          | <chem>COc1ccc(cc1OC)CCN(CCC[C@](c1ccc(c(c1)OC)OC)(C(C)C)C#N)C</chem>                                                                                                |
| Vinblastine        | <chem>COc1cc2N(C)[C@@H]3[C@@]4(c2cc1[C@]1(C[C@@H]2CN(CCc5c1[nH]c1c5cccc1)C[C@@](C2)(O)CC)C(=O)OC)CCN1[C@H]4[C@@]([C@H]([C@]3(O)C(=O)OC)OC(=O)C)(CC)C=CC1</chem>     |
| Vincristine        | <chem>O=CN1c2cc(OC)c(cc2[C@]23[C@@H]1[C@@](O)(C(=O)OC)[C@H](OC(=O)C)[C@]1([C@@H]3N(CC2)CC=C1)CC)[C@]1(C[C@@H]2CN(CCc3c1[nH]c1c3cccc1)C[C@@](C2)(O)CC)C(=O)OC</chem> |
| Zidovudine         | <chem>OC[C@H]1O[C@H](C[C@@H]1N=[N+]=[N-])n1cc(C)c(=O)[nH]c1=O</chem>                                                                                                |

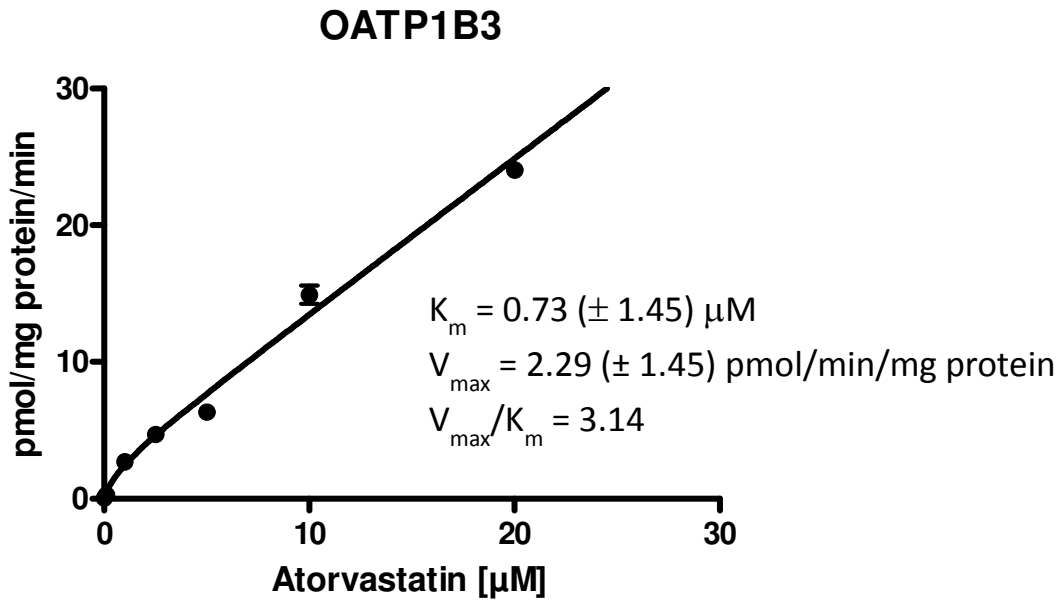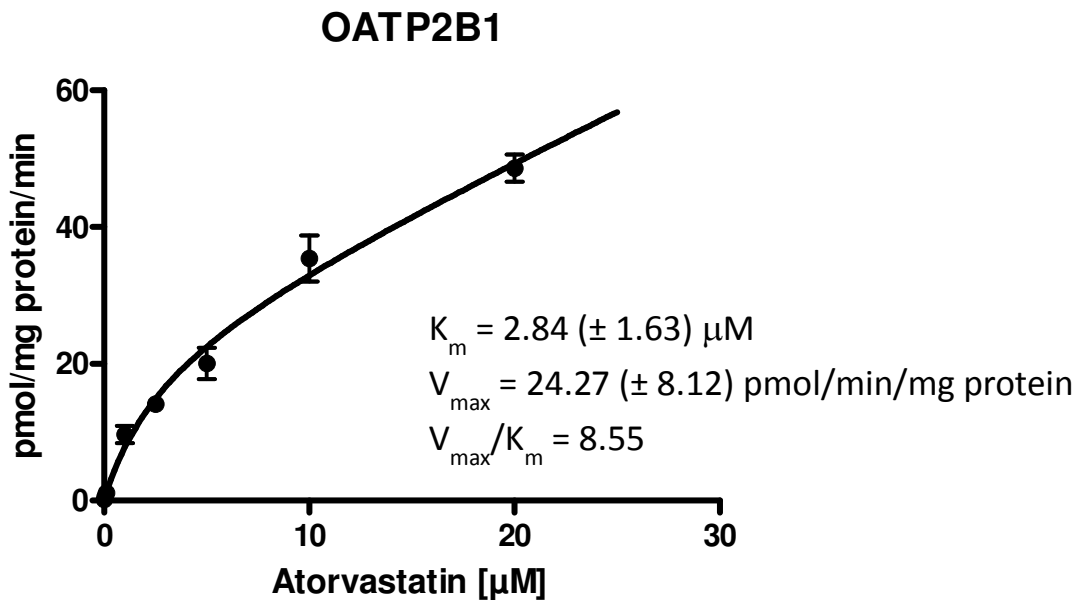

**Supplementary Figure 1.** Michaelis-Menten kinetics of uptake in HEK293 cells stably expressing OATP1B3 (a) or OATP2B1 (b) transporter. For both cell lines cells grown in 24-well plates were incubated with 0.01-20  $\mu\text{M}$  atorvastatin at 37°C. The intracellular accumulation of atorvastatin was measured using LC-MS/MS and the results are presented as the uptake in pmol per minute and per mg total protein. Each data point represents the mean uptake  $\pm$  standard deviation (n=2). A corresponding curve for OATP1B1 can be found elsewhere (OATP1B1:  $K_m = 0.77 \mu\text{M}$ ,  $V_{\max} = 6.61 \text{ pmol/min}/\mu\text{g protein}$  and  $V_{\max}/K_m = 8.58$ ).<sup>1</sup>

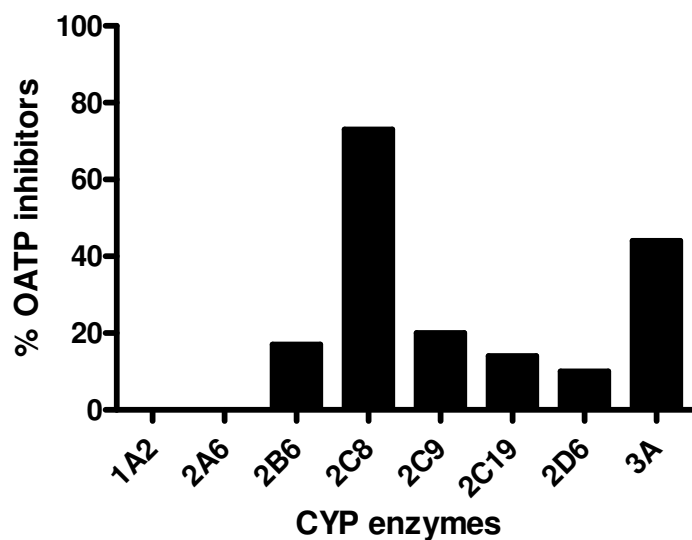

**Supplementary Figure 2.** Overlap between OATP inhibitors and compounds interacting with cytochrome P450 (CYP) enzymes. Out of a subset of 67 compounds, recommended as CYP substrates, inhibitors and/or inducers by the FDA and EMA,<sup>13</sup> 21 compounds were identified as OATP inhibitors in our screens. The bars represent the frequency (in percent) of OATP inhibitors identified among the interacting drugs of each individual CYP enzyme.

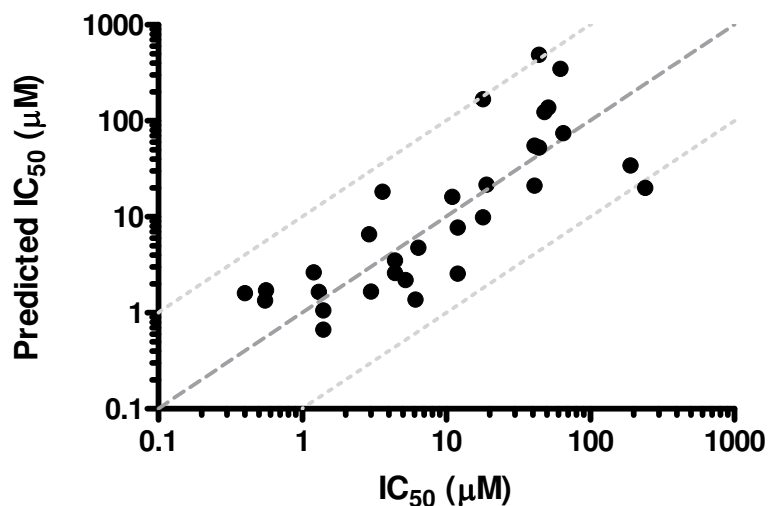

**Supplementary Figure 3.** Predicted vs experimental  $IC_{50}$  values for the 13 selected compounds and for all three OATP transporters. Predicted  $IC_{50}$  values were calculated based on the obtained single point inhibition results using Equation 6 and compared to the experimentally determined  $IC_{50}$  values. The dashed dark grey line is the unity line whereas the dotted light grey lines indicate 10-fold differences. Compounds inhibiting the transport to >100 % or <0 % in the single point inhibition studies as well as compounds where no experimentally  $IC_{50}$  could be determined were excluded. In total, 31 data points were included in the correlation.

## References

1. Karlgren, M.; Ahlin, G.; Bergstrom, C. A.; Svensson, R.; Palm, J.; Artursson, P., In Vitro and In Silico Strategies to Identify OATP1B1 Inhibitors and Predict Clinical Drug-Drug Interactions. *Pharm Res* **2011**.
